# Supplementary material for: Psychophysical Laws and the Superorganism
Source: PubMed Central journal article supplement (PMC5847525; doi:10.1038/s41598-018-22616-y), 2018-03-12
Supplement: 41598_2018_22616_MOESM1_ESM.pdf [file 41598_2018_22616_MOESM1_ESM.pdf]

SUPPLEMENTARY INFORMATION  
Psychophysical Laws and the Superorganism

Andreagiovanni Reina<sup>1,\*</sup>, Thomas Bose<sup>1</sup>, Vito Trianni<sup>2</sup>, and James A. R. Marshall<sup>1</sup>

<sup>1</sup>Department of Computer Science, University of Sheffield, S1 4DP, UK

<sup>2</sup>ISTC, Italian National Research Council, Rome, Italy

\*Corresponding author: a.reina@sheffield.ac.uk

Supplementary Table S1: Fitted parameters for the line  $\Delta v = w\bar{v}$  for varying system size  $S$  and signalling ratio  $r = h/k$ . Value  $R^2$  indicates the quality of fit.

| $S$  | $r$ | $w$   | $R^2$   |
|------|-----|-------|---------|
| 10   | 1   | 0.211 | 0.9999  |
| 10   | 2   | 0.229 | 0.9999  |
| 10   | 3   | 0.248 | 0.9998  |
| 10   | 4   | 0.259 | 0.9997  |
| 10   | 5   | 0.272 | >0.9999 |
| 50   | 1   | 0.064 | 0.9988  |
| 50   | 2   | 0.083 | 0.9998  |
| 50   | 3   | 0.105 | 0.9999  |
| 50   | 4   | 0.118 | >0.9999 |
| 50   | 5   | 0.125 | 0.9999  |
| 100  | 1   | 0.038 | 0.9997  |
| 100  | 2   | 0.051 | 0.9997  |
| 100  | 3   | 0.062 | 0.9999  |
| 100  | 4   | 0.071 | >0.9999 |
| 100  | 5   | 0.082 | >0.9999 |
| 500  | 1   | 0.018 | 0.9996  |
| 500  | 2   | 0.023 | 0.9994  |
| 500  | 3   | 0.026 | 0.9997  |
| 500  | 4   | 0.03  | 0.9998  |
| 500  | 5   | 0.034 | 0.9998  |
| 1000 | 1   | 0.013 | 0.9988  |
| 1000 | 2   | 0.015 | 0.9994  |
| 1000 | 3   | 0.018 | 0.9993  |
| 1000 | 4   | 0.019 | 0.9994  |
| 1000 | 5   | 0.02  | 0.9991  |

Supplementary Table S2: Fitted parameters for the curve of Eq. (5),  $RT = s_1 e^{s_2 n}$  (see Fig. 3(left)) for varying signalling ratio  $r \in \{2, 5, 10\}$  and decision difficulties  $\kappa$ . Value  $E$  indicates the quality of fit.

| $r$ | $\kappa$ | $s_1$ | $s_2$ | $R^2$   | $\alpha$ | $\beta$ | $\mu$ | $R^2$  |
|-----|----------|-------|-------|---------|----------|---------|-------|--------|
| 2   | 1.       | 0.014 | 2.541 | >0.9999 | 0.085    | 1.121   | 2.527 | 0.9998 |
| 2   | 0.83     | 0.084 | 0.954 | 0.9967  | 0.49     | 0.981   | 0.914 | 0.9973 |
| 2   | 0.71     | 0.091 | 0.668 | 0.9984  | 0.055    | 0.01    | 0.819 | 0.9969 |
| 2   | 0.62     | 0.074 | 0.562 | 0.9985  | 0.075    | 0.01    | 0.561 | 0.9985 |
| 2   | 0.56     | 0.084 | 0.42  | 0.9991  | 0.049    | 0.01    | 0.515 | 0.9941 |
| 2   | 0.5      | 0.075 | 0.361 | 0.9984  | 0.041    | 0.01    | 0.442 | 0.9868 |
| 2   | 0.45     | 0.064 | 0.318 | 0.9969  | 0.034    | 0.01    | 0.389 | 0.9836 |
| 2   | 0.42     | 0.061 | 0.274 | 0.997   | 0.036    | 0.02    | 0.326 | 0.9873 |
| 2   | 0.38     | 0.061 | 0.235 | 0.9976  | 0.063    | 0.012   | 0.234 | 0.9976 |
| 2   | 0.36     | 0.078 | 0.184 | 0.9993  | 0.203    | 0.482   | 0.175 | 0.9995 |
| 2   | 0.33     | 0.078 | 0.161 | 0.9988  | 0.4      | 0.798   | 0.143 | 0.9999 |
| 5   | 1.       | 0.059 | 1.162 | 0.9991  | 0.364    | 1.062   | 1.123 | 0.999  |
| 5   | 0.83     | 0.066 | 0.601 | 0.999   | 0.49     | 1.155   | 0.581 | 0.9991 |
| 5   | 0.71     | 0.06  | 0.426 | 0.9979  | 0.061    | 0.01    | 0.425 | 0.9979 |
| 5   | 0.62     | 0.03  | 0.407 | 0.9901  | 0.032    | 0.01    | 0.402 | 0.9893 |
| 5   | 0.56     | 0.012 | 0.406 | 0.9806  | 0.478    | 1.923   | 0.364 | 0.9738 |
| 5   | 0.5      | 0.035 | 0.243 | 0.993   | 0.037    | 0.016   | 0.242 | 0.9929 |
| 5   | 0.45     | 0.055 | 0.163 | 0.9994  | 0.115    | 0.39    | 0.157 | 0.9995 |
| 5   | 0.42     | 0.054 | 0.138 | 0.9991  | 0.202    | 0.674   | 0.125 | 0.9999 |
| 5   | 0.38     | 0.05  | 0.122 | 0.9985  | 0.209    | 0.709   | 0.106 | 0.9999 |
| 5   | 0.36     | 0.045 | 0.113 | 0.9984  | 0.17     | 0.639   | 0.096 | 0.9998 |
| 5   | 0.33     | 0.041 | 0.105 | 0.9982  | 0.146    | 0.59    | 0.088 | 0.9997 |
| 10  | 1.       | 0.033 | 0.948 | 0.9977  | 0.187    | 1.037   | 0.929 | 0.9968 |
| 10  | 0.83     | 0.044 | 0.428 | 0.9962  | 0.045    | 0.01    | 0.428 | 0.9962 |
| 10  | 0.71     | 0.017 | 0.394 | 0.9827  | 0.172    | 1.33    | 0.381 | 0.9803 |
| 10  | 0.62     | 0.006 | 0.377 | 0.9691  | 0.016    | 0.296   | 0.333 | 0.9617 |
| 10  | 0.56     | 0.042 | 0.15  | 0.9992  | 0.089    | 0.407   | 0.146 | 0.9993 |
| 10  | 0.5      | 0.04  | 0.122 | 0.9991  | 0.151    | 0.699   | 0.11  | 0.9999 |
| 10  | 0.45     | 0.036 | 0.105 | 0.9986  | 0.145    | 0.703   | 0.091 | 0.9999 |
| 10  | 0.42     | 0.033 | 0.095 | 0.9985  | 0.108    | 0.594   | 0.08  | 0.9998 |
| 10  | 0.38     | 0.029 | 0.088 | 0.9987  | 0.078    | 0.472   | 0.075 | 0.9998 |
| 10  | 0.36     | 0.026 | 0.082 | 0.9989  | 0.059    | 0.376   | 0.071 | 0.9998 |
| 10  | 0.33     | 0.024 | 0.077 | 0.9991  | 0.048    | 0.31    | 0.067 | 0.9998 |

Supplementary Table S3: Fitted parameters for the curve  $RT = av^{-b}$  (see Fig. 4) for varying signalling ratio  $r$ . Value  $R^2$  indicates the quality of fit.

| $r$ | $n$ | $a$    | $b$   | $R^2$   | $\alpha$ | $\beta$ | $\mu$ | $R^2$  |
|-----|-----|--------|-------|---------|----------|---------|-------|--------|
| 2   | 2   | 13.675 | 1.13  | 0.9998  | 0.085    | 1.121   | 2.527 | 0.9998 |
| 3   | 2   | 6.291  | 1.035 | 0.9999  | 0.828    | 1.035   | 1.013 | 0.9999 |
| 3   | 3   | 62.303 | 1.13  | 0.9993  | 0.828    | 1.035   | 1.013 | 0.9999 |
| 4   | 2   | 4.641  | 1.059 | 0.9999  | 0.287    | 1.06    | 1.392 | 0.9997 |
| 4   | 3   | 18.654 | 1.059 | 0.9998  | 0.287    | 1.06    | 1.392 | 0.9997 |
| 5   | 2   | 3.289  | 1.028 | >0.9999 | 0.364    | 1.062   | 1.123 | 0.999  |
| 5   | 3   | 10.906 | 1.078 | 0.9998  | 0.364    | 1.062   | 1.123 | 0.999  |
| 6   | 2   | 2.532  | 1.014 | 0.9999  | 0.4      | 1.052   | 0.96  | 0.9995 |
| 6   | 3   | 7.308  | 1.063 | 0.9995  | 0.4      | 1.052   | 0.96  | 0.9995 |
| 7   | 2   | 2.039  | 0.991 | >0.9999 | 0.412    | 0.998   | 0.807 | 0.9999 |
| 7   | 3   | 4.645  | 0.999 | 0.9999  | 0.412    | 0.998   | 0.807 | 0.9999 |
| 7   | 4   | 28.809 | 0.841 | 0.9983  | 0.412    | 0.998   | 0.807 | 0.9999 |
| 8   | 2   | 1.839  | 1.007 | >0.9999 | 0.083    | 0.806   | 1.164 | 0.9799 |
| 8   | 3   | 3.706  | 1.001 | 0.9999  | 0.083    | 0.806   | 1.164 | 0.9799 |
| 8   | 4   | 24.017 | 1.152 | 0.999   | 0.083    | 0.806   | 1.164 | 0.9799 |
| 9   | 2   | 1.593  | 1.006 | >0.9999 | 0.121    | 0.959   | 1.073 | 0.9922 |
| 9   | 3   | 3.184  | 1.031 | 0.9999  | 0.121    | 0.959   | 1.073 | 0.9922 |
| 9   | 4   | 13.525 | 1.133 | 0.9988  | 0.121    | 0.959   | 1.073 | 0.9922 |
| 10  | 2   | 1.372  | 0.989 | >0.9999 | 0.187    | 1.037   | 0.929 | 0.9968 |
| 10  | 3   | 2.699  | 1.02  | >0.9999 | 0.187    | 1.037   | 0.929 | 0.9968 |
| 10  | 4   | 7.9    | 1.048 | 0.9998  | 0.187    | 1.037   | 0.929 | 0.9968 |
| 15  | 2   | 0.933  | 1.019 | >0.9999 | 0.043    | 0.892   | 1.015 | 0.9811 |
| 15  | 3   | 1.48   | 1.006 | >0.9999 | 0.043    | 0.892   | 1.015 | 0.9811 |
| 15  | 4   | 2.528  | 0.974 | 0.9997  | 0.043    | 0.892   | 1.015 | 0.9811 |
| 15  | 5   | 9.646  | 1.019 | 0.9986  | 0.043    | 0.892   | 1.015 | 0.9811 |
| 20  | 2   | 0.642  | 0.997 | >0.9999 | 0.197    | 1.023   | 0.554 | 0.9982 |
| 20  | 3   | 1.007  | 0.996 | >0.9999 | 0.197    | 1.023   | 0.554 | 0.9982 |
| 20  | 4   | 1.718  | 1.028 | 0.9999  | 0.197    | 1.023   | 0.554 | 0.9982 |
| 20  | 5   | 3.202  | 1.026 | 0.9994  | 0.197    | 1.023   | 0.554 | 0.9982 |

Supplementary Table S4: Fitted parameters for the curve  $RT = \alpha v^{-\beta} e^{f_\mu(\kappa)n}$  with  $f_\mu(\kappa) = m_1 + m_2 \kappa^{m_3}$  for varying signalling ratio  $r$ . Value  $R^2$  indicates the quality of fit.

| $r$ | $\alpha$ | $\beta$ | $m_1$ | $m_2$ | $m_3$ | $R^2$  |
|-----|----------|---------|-------|-------|-------|--------|
| 2   | 0.132    | 0.555   | 0.027 | 1.619 | 2.062 | 0.9845 |
| 5   | 0.112    | 0.624   | 0.063 | 1.11  | 2.696 | 0.977  |
| 10  | 0.104    | 0.891   | 0.097 | 0.896 | 3.671 | 0.9695 |
